# Supplementary material
Source: PubMed Central journal article supplement (PMC1959457)

## Supplementary Appendix 1

### Analysis with DAVID Software

To assign annotations to the differentially expressed genes, as determined by empirical Bayes analysis, we used DAVID software (<http://david.abcc.ncifcrf.gov/>). The Mouse430\_2 background was chosen as the background setting. For enrichment analysis, default settings were used (Count: 2, EASE: 0.1, #Records: 1000).

The levels in the GO annotation analysis were chosen to achieve a balance between capturing the global processes and providing some details.

### Molecular Function Level 2, Cellular Component Level 4, Biological Process Level 5

Before analysis, RefSeq accession numbers were mapped to NCBI Gene ID numbers to control for the possibility that multiple identifiers on the list refer to the same gene. The NCBI Gene ID numbers were then mapped to gene categories (e.g., Apoptosis) within various categorical systems (e.g., Molecular Function). The enrichment in each category was then calculated as the **Fisher exact probability**. These are the  $P$  values shown in Figure 3a.

To strongly penalize the significance of categories supported by few genes and negligibly penalize categories supported by many genes, we used the EASE score (the default metric in DAVID) to rank categories of genes in Figure 3a. The EASE score is described as the upper bound of the distribution of Jackknife Fisher exact probabilities.

For further information about the analysis methods please refer to the following two references.

1. Dennis G Jr et al. (2003) *DAVID: Database for Annotation, Visualization, and Integrated Discovery*. *Genome Biol* 4:P3.
2. <http://david.abcc.ncifcrf.gov/>

## Analysis with the Gene Set Enrichment Analysis (GSEA)

As detailed in the first reference below, the GSEA method tests groups of genes rather than individual genes, in contrast to the empirical Bayes test. The notion is that certain genes have a closer relationship than others by regulation, function, chromosomal context, etc. and therefore should be tested together. By manually screening the contribution of different database sources to the original gene set, we concluded that the pathways from KEGG and Biocarta were the most reliable and complete. Hence, we restricted our gene sets to those two databases. Also, to filter out highly incomplete pathways, we used a lower threshold of pathways consisting of fewer than 10 genes, leaving 202 pathways for testing (for a complete list, see below). Since many of the pathways were found in both databases, in general, the lower threshold only left the best-annotated pathway copy. As described in the parameter section below, the *t* test was used as the metric, and 250 phenotype permutations were run. Core enrichment for the proteasome degradation pathway is shown below. Leading edge analysis was not performed. For further information about the analysis methods, please refer to the following three references.

1. Subramanian A et al. (2005) Gene set enrichment analysis: a knowledge-based approach for interpreting genome-wide expression profiles. *Proc Natl Acad Sci USA* 102:15545-50.
2. Mootha VK et al. (2003) PGC-1alpha-responsive genes involved in oxidative phosphorylation are coordinately downregulated in human diabetes. *Nat Genet* 34:267-73.
3. <http://www.broad.mit.edu/gsea/>

### Parameters Used in the Analysis

|       |                |                                |
|-------|----------------|--------------------------------|
| param | norm           | meandiv                        |
| param | save_rnd_lists | false                          |
| param | median         | false                          |
| param | scoring_scheme | weighted                       |
| param | make_sets      | true                           |
| param | gmx            | C:\c2.refseq Biocarta KEGG.gmt |
| param | gui            | true                           |
| param | chip           | Mouse430_2                     |
| param | metric         | t-test                         |
| param | order          | descending                     |
| param | permute        | phenotype                      |

|       |          |            |
|-------|----------|------------|
| param | rnd_type | no_balance |
| param | set_min  | 10         |
| param | sort     | real       |
| param | rnd_seed | timestamp  |
| param | nperm    | 250        |
| param | set_max  | 500        |

### Gene Set Used in the Analysis (KEGG + Biocarta)

| NAME                  | ORIGINAL SIZE | AFTER RESTRICTING |
|-----------------------|---------------|-------------------|
| 41bbPathway           | 18            | 18                |
| ace2Pathway           | 10            | 10                |
| acetaminophenPathway  | 5             | Rejected!         |
| achPathway            | 13            | 13                |
| actinYPathway         | 15            | 15                |
| agpcrPathway          | 12            | 12                |
| ahspPathway           | 9             | Rejected!         |
| akap13Pathway         | 8             | Rejected!         |
| akap96Pathway         | 9             | Rejected!         |
| akapCentrosomePathway | 8             | Rejected!         |
| aktPathway            | 14            | 14                |
| alkPathway            | 32            | 32                |
| alternativePathway    | 4             | Rejected!         |
| amiPathway            | 18            | 18                |
| arapPathway           | 16            | 16                |
| arenrf2Pathway        | 14            | 14                |
| arfPathway            | 8             | Rejected!         |
| argininecPathway      | 5             | Rejected!         |
| asbcellPathway        | 6             | Rejected!         |
| at1rPathway           | 32            | 32                |
| atmPathway            | 16            | 16                |
| atrbrcaPathway        | 15            | 15                |
| badPathway            | 18            | 18                |
| bbcellPathway         | 2             | Rejected!         |
| bcrPathway            | 33            | 33                |
| biopeptidesPathway    | 36            | 36                |
| blymphocytePathway    | 7             | Rejected!         |
| cacamPathway          | 14            | 14                |
| calcineurinPathway    | 18            | 18                |
| cardiacegfPathway     | 15            | 15                |
| carm1Pathway          | 12            | 12                |
| carm-erPathway        | 26            | 26                |
| caspase_activity      | 6             | Rejected!         |
| caspasePathway        | 20            | 20                |
| cblPathway            | 13            | 13                |
| ccr3Pathway           | 18            | 18                |
| ccr5Pathway           | 17            | 17                |
| cd40Pathway           | 13            | 13                |
| cdc25Pathway          | 8             | Rejected!         |
| cdc42racPathway       | 12            | 12                |
| cdk5Pathway           | 11            | 11                |
| cdmacPathway          | 15            | 15                |
| cell2cellPathway      | 13            | 13                |

|                                 |    |           |
|---------------------------------|----|-----------|
| cellcyclePathway                | 21 | 21        |
| ceramidePathway                 | 22 | 22        |
| cftrPathway                     | 11 | 11        |
| chemicalPathway                 | 19 | 19        |
| chrebpPathway                   | 16 | 16        |
| circadianPathway                | 6  | Rejected! |
| ck1Pathway                      | 15 | 15        |
| classicPathway                  | 11 | 11        |
| Complement_Activation_Classical | 11 | 11        |
| compPathway                     | 14 | 14        |
| crebPathway                     | 24 | 24        |
| cremPathway                     | 7  | Rejected! |
| cskPathway                      | 18 | 18        |
| ctla4Pathway                    | 15 | 15        |
| ctlPathway                      | 9  | Rejected! |
| cxcr4Pathway                    | 21 | 21        |
| cytokinePathway                 | 19 | 19        |
| d4gdiPathway                    | 10 | 10        |
| dbpbPathway                     | 3  | Rejected! |
| dcPathway                       | 21 | 21        |
| deathPathway                    | 29 | 29        |
| DNA_DAMAGE_SIGNALLING           | 84 | 84        |
| dnafragmentPathway              | 9  | Rejected! |
| dreamPathway                    | 12 | 12        |
| drug_resistance_and_metabolism  | 83 | 83        |
| ecmPathway                      | 19 | 19        |
| edg1Pathway                     | 23 | 23        |
| eea1Pathway                     | 6  | Rejected! |
| EGF_receptor_signaling_pathway  | 12 | 12        |
| egfPathway                      | 24 | 24        |
| egfr_smrtePathway               | 10 | 10        |
| Eicosanoid_Synthesis            | 13 | 13        |
| eif2Pathway                     | 8  | Rejected! |
| eif4Pathway                     | 21 | 21        |
| electron_transport              | 48 | 48        |
| Electron_Transport_Chain        | 78 | 78        |
| electron_transporter_activity   | 91 | 91        |
| eosinophilsPathway              | 6  | Rejected! |
| ephA4Pathway                    | 10 | 10        |
| eponfkbPathway                  | 10 | 10        |
| epoPathway                      | 16 | 16        |
| erbb3Pathway                    | 4  | Rejected! |
| erbb4Pathway                    | 5  | Rejected! |
| erk5Pathway                     | 13 | 13        |
| erkPathway                      | 28 | 28        |
| erythPathway                    | 13 | 13        |
| etcPathway                      | 9  | Rejected! |
| etsPathway                      | 17 | 17        |
| extrinsicPathway                | 12 | 12        |
| fasPathway                      | 25 | 25        |
| Fatty_Acid_Degradation          | 18 | 18        |
| fatty_acid_metabolism           | 20 | 20        |
| Fatty_Acid_Synthesis            | 12 | 12        |
| fbw7Pathway                     | 9  | Rejected! |

|                               |    |           |
|-------------------------------|----|-----------|
| fcgr1Pathway                  | 34 | 34        |
| feederPathway                 | 7  | Rejected! |
| fibrinolysisPathway           | 12 | 12        |
| flumazenilPathway             | 9  | Rejected! |
| Fm1ppathway                   | 36 | 36        |
| freePathway                   | 8  | Rejected! |
| fxrPathway                    | 6  | Rejected! |
| G13_Signaling_Pathway         | 28 | 28        |
| g1Pathway                     | 22 | 22        |
| g2Pathway                     | 20 | 20        |
| gabaPathway                   | 12 | 12        |
| gata3Pathway                  | 15 | 15        |
| gcrPathway                    | 16 | 16        |
| ghPathway                     | 21 | 21        |
| gleevecPathway                | 19 | 19        |
| Glycogen_Metabolism           | 30 | 30        |
| glycolysisPathway             | 8  | Rejected! |
| gpcrPathway                   | 31 | 31        |
| gsk3Pathway                   | 25 | 25        |
| gsPathway                     | 6  | Rejected! |
| hbxPathway                    | 6  | Rejected! |
| hcmvPathway                   | 15 | 15        |
| hdacPathway                   | 28 | 28        |
| hifPathway                    | 11 | 11        |
| hivnefPathway                 | 51 | 51        |
| hsp27Pathway                  | 13 | 13        |
| ifnaPathway                   | 9  | Rejected! |
| ifngPathway                   | 6  | Rejected! |
| igf1mtorPathway               | 18 | 18        |
| igf1Pathway                   | 17 | 17        |
| igf1rPathway                  | 12 | 12        |
| il10Pathway                   | 13 | 13        |
| il12Pathway                   | 20 | 20        |
| il17Pathway                   | 9  | Rejected! |
| il18Pathway                   | 6  | Rejected! |
| il1rPathway                   | 31 | 31        |
| il22bpPathway                 | 11 | 11        |
| il2Pathway                    | 21 | 21        |
| il2rbPathway                  | 31 | 31        |
| il3Pathway                    | 13 | 13        |
| il4Pathway                    | 9  | Rejected! |
| il5Pathway                    | 8  | Rejected! |
| il6Pathway                    | 19 | 19        |
| il7Pathway                    | 15 | 15        |
| Inflammatory_Response_Pathway | 23 | 23        |
| inflamPathway                 | 26 | 26        |
| insulin_signalling            | 83 | 83        |
| insulinPathway                | 17 | 17        |
| integrinPathway               | 31 | 31        |
| intrinsicPathway              | 21 | 21        |
| ionPathway                    | 4  | Rejected! |
| keratinocytePathway           | 40 | 40        |
| krebPathway                   | 7  | Rejected! |
| Krebs-TCA_Cycle               | 25 | 25        |

|                           |    |           |
|---------------------------|----|-----------|
| lairPathway               | 12 | 12        |
| ldlPathway                | 6  | Rejected! |
| lechtinPathway            | 10 | 10        |
| leptinPathway             | 10 | 10        |
| longevityPathway          | 11 | 11        |
| lymphocytePathway         | 9  | Rejected! |
| mapkPathway               | 77 | 77        |
| Matrix_Metalloproteinases | 22 | 22        |
| mcalpainPathway           | 22 | 22        |
| mef2dPathway              | 18 | 18        |
| metPathway                | 32 | 32        |
| mitochondriaPathway       | 20 | 20        |
| mitrPathway               | 9  | Rejected! |
| monocytePathway           | 11 | 11        |
| mprPathway                | 20 | 20        |
| mRNA_binding_activity     | 9  | Rejected! |
| mRNA_processing           | 38 | 38        |
| mRNA_splicing             | 38 | 38        |
| mrpPathway                | 5  | Rejected! |
| mshPathway                | 6  | Rejected! |
| mta3Pathway               | 15 | 15        |
| mtorPathway               | 20 | 20        |
| muscle_myosin             | 10 | 10        |
| myosinPathway             | 13 | 13        |
| ndkDynaminPathway         | 18 | 18        |
| neutrophilPathway         | 8  | Rejected! |
| nfatPathway               | 46 | 46        |
| nfbkPathway               | 23 | 23        |
| ngfPathway                | 15 | 15        |
| nkcellsPathway            | 17 | 17        |
| nktPathway                | 27 | 27        |
| no1Pathway                | 26 | 26        |
| no2il12Pathway            | 15 | 15        |
| nos1Pathway               | 20 | 20        |
| nthiPathway               | 21 | 21        |
| p27Pathway                | 13 | 13        |
| p35alzheimersPathway      | 10 | 10        |
| p38mapkPathway            | 38 | 38        |
| p53_signalling            | 79 | 79        |
| p53hypoxiaPathway         | 16 | 16        |
| p53Pathway                | 14 | 14        |
| par1Pathway               | 18 | 18        |
| parkinPathway             | 9  | Rejected! |
| pdgfPathway               | 24 | 24        |
| pelp1Pathway              | 7  | Rejected! |
| pepiPathway               | 5  | Rejected! |
| pgc1aPathway              | 23 | 23        |
| pitx2Pathway              | 14 | 14        |
| pkcPathway                | 7  | Rejected! |
| plcdPathway               | 5  | Rejected! |
| plcePathway               | 11 | 11        |
| plcPathway                | 6  | Rejected! |
| plk3Pathway               | 5  | Rejected! |
| pmlPathway                | 10 | 10        |

|                            |    |           |
|----------------------------|----|-----------|
| pparaPathway               | 48 | 48        |
| ppargPathway               | 8  | Rejected! |
| Proteasome_Degradation     | 30 | 30        |
| proteasomePathway          | 20 | 20        |
| ps1Pathway                 | 14 | 14        |
| ptc1Pathway                | 9  | Rejected! |
| ptdinsPathway              | 21 | 21        |
| ptenPathway                | 16 | 16        |
| pyk2Pathway                | 27 | 27        |
| rabPathway                 | 8  | Rejected! |
| rac1Pathway                | 19 | 19        |
| raccycdPathway             | 20 | 20        |
| radiation_sensitivity      | 18 | 18        |
| ranklPathway               | 13 | 13        |
| ranPathway                 | 4  | Rejected! |
| rarrxrPathway              | 15 | 15        |
| rasPathway                 | 20 | 20        |
| rbPathway                  | 11 | 11        |
| reckPathway                | 8  | Rejected! |
| reelinPathway              | 7  | Rejected! |
| relaPathway                | 16 | 16        |
| rhoPathway                 | 26 | 26        |
| rnaPathway                 | 8  | Rejected! |
| S1P_Signaling              | 23 | 23        |
| s1pPathway                 | 6  | Rejected! |
| salmonellaPathway          | 11 | 11        |
| sarsPathway                | 9  | Rejected! |
| setPathway                 | 10 | 10        |
| shhPathway                 | 12 | 12        |
| skp2e2fPathway             | 10 | 10        |
| slrp2Pathway               | 4  | Rejected! |
| slrpPathway                | 6  | Rejected! |
| soddPathway                | 10 | 10        |
| sppaPathway                | 21 | 21        |
| spryPathway                | 17 | 17        |
| srcRPTPPathway             | 10 | 10        |
| stat3Pathway               | 8  | Rejected! |
| stemPathway                | 12 | 12        |
| stressPathway              | 25 | 25        |
| tall1Pathway               | 14 | 14        |
| tcapoptosisPathway         | 6  | Rejected! |
| tcraPathway                | 8  | Rejected! |
| tcrPathway                 | 39 | 39        |
| tcytotoxicPathway          | 10 | 10        |
| telPathway                 | 14 | 14        |
| tercPathway                | 6  | Rejected! |
| tertPathway                | 6  | Rejected! |
| TGF_Beta_Signaling_Pathway | 33 | 33        |
| tgfbPathway                | 14 | 14        |
| th1th2Pathway              | 14 | 14        |
| thelperPathway             | 11 | 11        |
| tidPathway                 | 17 | 17        |
| tnf_and_fas_network        | 17 | 17        |
| tnfr1Pathway               | 27 | 27        |

|                   |    |           |
|-------------------|----|-----------|
| tnfr2Pathway      | 18 | 18        |
| tob1Pathway       | 16 | 16        |
| tollPathway       | 33 | 33        |
| tpoPathway        | 20 | 20        |
| trkaPathway       | 9  | Rejected! |
| tRNA_Synthetases  | 18 | 18        |
| tsp1Pathway       | 7  | Rejected! |
| tubbyPathway      | 7  | Rejected! |
| tumor_supressor   | 18 | 18        |
| ucalpainPathway   | 15 | 15        |
| ureacyclicPathway | 4  | Rejected! |
| vegfPathway       | 21 | 21        |
| vipPathway        | 25 | 25        |
| vitcbPathway      | 11 | 11        |
| vobesityPathway   | 7  | Rejected! |
| VOXPHOS           | 76 | 76        |
| Wnt_Signaling     | 49 | 49        |
| wntPathway        | 25 | 25        |

## GSEA Report and Statistics

### Enrichment in phenotype: CRP- (4 samples)

118/202 gene sets had enrichment in phenotype **CRP-**

9 gene sets are significant at nominal p-value <5%

0 gene sets are significant at FDR <25%

### Enrichment in phenotype: CRP+ (4 samples)

84/202 gene sets had enrichment in phenotype **CRP+**

8 gene sets are significant at nominal *P* value <5%

5 gene sets are significant at FDR <25%

### Gene markers for the CRP- versus CRP+ comparison

The dataset had 16607 features (genes)

# of markers for phenotype **CRP-**: 7454 (44.9%) with correlation area 40.0%

# of markers for phenotype **CRP+**: 9153 (55.1%) with correlation area 60.0%

### Advanced statistics and plots

Gene set size filters (min=10, max=500) resulted in filtering out 75/277 gene sets

### Enrichment in phenotype: CRP+ (4 samples)

| NAME                     | SIZE | ES       | NES      | NOM<br><i>P</i> value | FDR<br>q value | FWER<br><i>P</i> value |
|--------------------------|------|----------|----------|-----------------------|----------------|------------------------|
| Electron_Transport_Chain | 78   | -0.71472 | -1.7821  | 0                     | 0.036          | 0                      |
| VOXPHOS                  | 76   | -0.68304 | -1.63741 | 0                     | 0.108741       | 0.192                  |
| p27Pathway               | 13   | -0.68279 | -1.62864 | 0                     | 0.090894       | 0.224                  |
| Proteasome_Degradation   | 30   | -0.69531 | -1.60481 | 0                     | 0.08432        | 0.224                  |
| proteasomePathway        | 20   | -0.7701  | -1.52154 | 0                     | 0.190091       | 0.456                  |
| skp2e2fPathway           | 10   | -0.6821  | -1.46507 | 0.042781              | 0.298218       | 0.596                  |



|                                 |    |          |          |          |          |       |
|---------------------------------|----|----------|----------|----------|----------|-------|
| mitochondriaPathway             | 20 | -0.58958 | -1.4581  | 0        | 0.290509 | 0.596 |
| th1th2Pathway                   | 14 | -0.58699 | -1.34132 | 0.078125 | 0.653106 | 0.768 |
| nkcellsPathway                  | 17 | -0.67354 | -1.29402 | 0.101064 | 0.790315 | 0.824 |
| caspasePathway                  | 20 | -0.6505  | -1.25519 | 0.078431 | 0.949387 | 0.888 |
| d4gdiPathway                    | 10 | -0.61116 | -1.24869 | 0.076389 | 0.896234 | 0.888 |
| setPathway                      | 10 | -0.64307 | -1.23894 | 0.137255 | 0.884141 | 0.888 |
| mta3Pathway                     | 15 | -0.40261 | -1.23315 | 0.202899 | 0.84278  | 0.888 |
| Eicosanoid_Synthesis            | 13 | -0.61116 | -1.22767 | 0.171296 | 0.809175 | 0.888 |
| extrinsicPathway                | 12 | -0.59612 | -1.18708 | 0.17561  | 0.988286 | 0.912 |
| ceramidePathway                 | 22 | -0.46642 | -1.17461 | 0.281609 | 0.993338 | 0.952 |
| cdk5Pathway                     | 11 | -0.39465 | -1.1594  | 0.164948 | 1        | 0.952 |
| Il12Pathway                     | 20 | -0.50286 | -1.09481 | 0.448052 | 1        | 0.972 |
| igf1mTORPathway                 | 18 | -0.3139  | -1.08105 | 0.258065 | 1        | 0.972 |
| ndkDynaminPathway               | 18 | -0.32465 | -1.06283 | 0.29     | 1        | 0.972 |
| DNA_DAMAGE_SIGNALLING           | 84 | -0.33138 | -1.03415 | 0.495652 | 1        | 1     |
| mRNA_processing                 | 38 | -0.37062 | -1.0296  | 0.402597 | 1        | 1     |
| deathPathway                    | 29 | -0.31416 | -1.02723 | 0.412214 | 1        | 1     |
| hsp27Pathway                    | 13 | -0.44428 | -1.02233 | 0.433526 | 1        | 1     |
| soddPathway                     | 10 | -0.43869 | -1.02179 | 0.348148 | 1        | 1     |
| rarrxrPathway                   | 15 | -0.30979 | -1.01704 | 0.47486  | 1        | 1     |
| cellcyclePathway                | 21 | -0.50236 | -1.01658 | 0.416185 | 1        | 1     |
| cytokinePathway                 | 19 | -0.49454 | -1.01356 | 0.497076 | 1        | 1     |
| electron_transporter_activity   | 91 | -0.3236  | -1.00227 | 0.391608 | 1        | 1     |
| Complement_Activation_Classical | 11 | -0.5834  | -0.98832 | 0.565957 | 1        | 1     |
| ctla4Pathway                    | 15 | -0.63321 | -0.98489 | 0.510345 | 1        | 1     |
| mRNA_splicing                   | 38 | -0.39429 | -0.98157 | 0.558442 | 1        | 1     |
| igf1rPathway                    | 12 | -0.42207 | -0.98089 | 0.440789 | 1        | 1     |
| ghPathway                       | 21 | -0.35247 | -0.97822 | 0.503597 | 1        | 1     |
| chemicalPathway                 | 19 | -0.38003 | -0.96369 | 0.466667 | 1        | 1     |
| classicPathway                  | 11 | -0.55566 | -0.95197 | 0.578261 | 1        | 1     |
| tnfr2Pathway                    | 18 | -0.3257  | -0.95133 | 0.539773 | 1        | 1     |
| no2il12Pathway                  | 15 | -0.54222 | -0.92704 | 0.61039  | 1        | 1     |
| mprPathway                      | 20 | -0.35818 | -0.90893 | 0.548077 | 1        | 1     |
| raccycdPathway                  | 20 | -0.37749 | -0.8996  | 0.734463 | 1        | 1     |
| il10Pathway                     | 13 | -0.60577 | -0.89772 | 0.675325 | 1        | 1     |
| G13_Signaling_Pathway           | 28 | -0.25708 | -0.8882  | 0.59375  | 1        | 1     |
| ccr3Pathway                     | 18 | -0.41464 | -0.87646 | 0.786207 | 1        | 1     |
| eif4Pathway                     | 21 | -0.3066  | -0.87505 | 0.463158 | 1        | 1     |
| Krebs-TCA_Cycle                 | 25 | -0.35221 | -0.87418 | 0.613636 | 1        | 1     |
| il2rbPathway                    | 31 | -0.28072 | -0.8725  | 0.6875   | 1        | 1     |
| tnf_and_fas_network             | 17 | -0.33103 | -0.85875 | 0.659864 | 1        | 1     |
| badPathway                      | 18 | -0.34588 | -0.85481 | 0.669355 | 1        | 1     |
| cdc42racPathway                 | 12 | -0.35936 | -0.83624 | 0.554545 | 1        | 1     |
| Glycogen_Metabolism             | 30 | -0.22689 | -0.8334  | 0.736434 | 1        | 1     |
| compPathway                     | 14 | -0.45602 | -0.83287 | 0.703057 | 1        | 1     |
| cacamPathway                    | 14 | -0.22955 | -0.82467 | 0.681416 | 1        | 1     |
| muscle_myosin                   | 10 | -0.55949 | -0.82253 | 0.725191 | 1        | 1     |
| cd40Pathway                     | 13 | -0.30631 | -0.817   | 0.646552 | 1        | 1     |
| nfkBPathway                     | 23 | -0.27017 | -0.81639 | 0.609589 | 1        | 1     |
| p53Pathway                      | 14 | -0.38916 | -0.81289 | 0.810127 | 1        | 1     |
| thelperPathway                  | 11 | -0.54448 | -0.7976  | 0.737931 | 1        | 1     |
| ccr5Pathway                     | 17 | -0.37847 | -0.79617 | 0.618644 | 1        | 1     |
| cxcr4Pathway                    | 21 | -0.28114 | -0.79274 | 0.825397 | 1        | 1     |
| radiation_sensitivity           | 18 | -0.31907 | -0.77817 | 0.809816 | 1        | 1     |

|                           |    |          |          |          |          |   |
|---------------------------|----|----------|----------|----------|----------|---|
| Fmlppathway               | 36 | -0.26454 | -0.77599 | 0.780142 | 1        | 1 |
| longevityPathway          | 11 | -0.33826 | -0.77431 | 0.747968 | 1        | 1 |
| tcytotoxicPathway         | 10 | -0.55382 | -0.77296 | 0.786207 | 1        | 1 |
| fasPathway                | 25 | -0.26731 | -0.76904 | 0.801047 | 1        | 1 |
| Matrix_Metalloproteinases | 22 | -0.33784 | -0.76768 | 0.891892 | 1        | 1 |
| nktPathway                | 27 | -0.34462 | -0.75999 | 0.777778 | 1        | 1 |
| erythPathway              | 13 | -0.41607 | -0.75379 | 0.755    | 1        | 1 |
| amiPathway                | 18 | -0.43373 | -0.75174 | 0.889655 | 0.994983 | 1 |
| cskPathway                | 18 | -0.43373 | -0.75174 | 0.889655 | 0.980563 | 1 |
| tob1Pathway               | 16 | -0.37918 | -0.75036 | 0.786207 | 0.968504 | 1 |
| tall1Pathway              | 14 | -0.29958 | -0.74698 | 0.719745 | 0.961188 | 1 |
| actinYPathway             | 15 | -0.31039 | -0.74256 | 0.642276 | 0.953984 | 1 |
| insulin_signalling        | 83 | -0.2289  | -0.73836 | 0.84375  | 0.945629 | 1 |
| gsk3Pathway               | 25 | -0.30596 | -0.72764 | 0.832298 | 0.944724 | 1 |
| lechtinPathway            | 10 | -0.37894 | -0.71796 | 0.767544 | 0.941425 | 1 |
| tcrPathway                | 39 | -0.31695 | -0.71391 | 0.934783 | 0.935749 | 1 |
| aktPathway                | 14 | -0.24468 | -0.7096  | 0.841379 | 0.93111  | 1 |
| electron_transport        | 48 | -0.16965 | -0.69415 | 0.905263 | 0.936444 | 1 |
| fcer1Pathway              | 34 | -0.26827 | -0.69351 | 0.923729 | 0.926649 | 1 |
| pyk2Pathway               | 27 | -0.22202 | -0.68724 | 0.869565 | 0.924706 | 1 |
| salmonellaPathway         | 11 | -0.29861 | -0.674   | 0.727273 | 0.927898 | 1 |
| inflamPathway             | 26 | -0.20719 | -0.54621 | 0.919598 | 0.998637 | 1 |
| dcPathway                 | 21 | -0.25088 | -0.53811 | 0.923077 | 0.988171 | 1 |
| stemPathway               | 12 | -0.22935 | -0.51588 | 0.853147 | 0.984842 | 1 |

#### Enrichment in phenotype: CRP- (4 samples)

| NAME                           | SIZE | ES       | NES      | NOM<br>P value | FDR<br>q value | FWER<br>P value |
|--------------------------------|------|----------|----------|----------------|----------------|-----------------|
| gata3Pathway                   | 15   | 0.532375 | 1.422452 | 0.055172       | 1              | 0.648           |
| egfr_smrtePathway              | 10   | 0.487912 | 1.410871 | 0.049645       | 1              | 0.696           |
| ace2Pathway                    | 10   | 0.69609  | 1.360714 | 0.011429       | 1              | 0.84            |
| shhPathway                     | 12   | 0.574704 | 1.358746 | 0.05988        | 1              | 0.84            |
| ucalpainPathway                | 15   | 0.627546 | 1.351219 | 0.051429       | 1              | 0.84            |
| relaPathway                    | 16   | 0.506285 | 1.336408 | 0.039106       | 1              | 0.84            |
| intrinsicPathway               | 21   | 0.531106 | 1.31908  | 0              | 1              | 0.872           |
| no1Pathway                     | 26   | 0.522752 | 1.316834 | 0.122581       | 1              | 0.872           |
| il22bpPathway                  | 11   | 0.6043   | 1.313382 | 0.110236       | 1              | 0.872           |
| cell2cellPathway               | 13   | 0.478184 | 1.310909 | 0.136095       | 0.997167       | 0.872           |
| pmlPathway                     | 10   | 0.574682 | 1.267221 | 0.176471       | 1              | 0.872           |
| TGF_Beta_Signaling_Pathway     | 33   | 0.50251  | 1.266292 | 0.227979       | 1              | 0.872           |
| EGF_receptor_signaling_pathway | 12   | 0.497561 | 1.266182 | 0.218045       | 1              | 0.872           |
| carm1Pathway                   | 12   | 0.692132 | 1.264346 | 0.049689       | 0.974136       | 0.872           |
| mapkPathway                    | 77   | 0.385176 | 1.256506 | 0.058065       | 0.966233       | 0.872           |
| vitcbPathway                   | 11   | 0.705188 | 1.244235 | 0.089286       | 0.993023       | 0.92            |
| ps1Pathway                     | 14   | 0.534021 | 1.243824 | 0.133803       | 0.937129       | 0.92            |
| cardiacegfPathway              | 15   | 0.60983  | 1.243451 | 0.195556       | 0.890459       | 0.92            |
| egfPathway                     | 24   | 0.524056 | 1.243386 | 0.22335        | 0.845488       | 0.92            |
| par1Pathway                    | 18   | 0.578763 | 1.210844 | 0.099379       | 0.951553       | 0.92            |
| Fatty_Acid_Synthesis           | 12   | 0.602853 | 1.195687 | 0.259669       | 0.969199       | 0.92            |
| integrinPathway                | 31   | 0.491597 | 1.194879 | 0.218935       | 0.928496       | 0.92            |
| pparaPathway                   | 48   | 0.503567 | 1.193528 | 0.150289       | 0.896399       | 0.92            |
| 41bbPathway                    | 18   | 0.506347 | 1.189958 | 0.244318       | 0.876778       | 0.92            |
| alkPathway                     | 32   | 0.510331 | 1.181609 | 0.226667       | 0.877702       | 0.92            |
| monocytePathway                | 11   | 0.596332 | 1.177618 | 0.281879       | 0.854848       | 0.92            |

|                               |    |          |          |          |          |       |
|-------------------------------|----|----------|----------|----------|----------|-------|
| spryPathway                   | 17 | 0.421169 | 1.172166 | 0.185714 | 0.849242 | 0.952 |
| rhoPathway                    | 26 | 0.528389 | 1.170802 | 0.198758 | 0.82584  | 0.952 |
| atmPathway                    | 16 | 0.519718 | 1.168206 | 0.234375 | 0.812351 | 0.952 |
| tumor_supressor               | 18 | 0.608874 | 1.162048 | 0.170732 | 0.805489 | 0.952 |
| pitx2Pathway                  | 14 | 0.505103 | 1.152855 | 0.385027 | 0.824298 | 0.952 |
| leptinPathway                 | 10 | 0.518603 | 1.144641 | 0.178771 | 0.833309 | 0.952 |
| pdgfPathway                   | 24 | 0.489255 | 1.143668 | 0.380435 | 0.81573  | 0.952 |
| fibrinolysisPathway           | 12 | 0.489946 | 1.135537 | 0.235849 | 0.822775 | 0.952 |
| metPathway                    | 32 | 0.453117 | 1.123562 | 0.25     | 0.846069 | 0.952 |
| vipPathway                    | 25 | 0.453984 | 1.1224   | 0.36076  | 0.825517 | 0.952 |
| ranklPathway                  | 13 | 0.50644  | 1.120561 | 0.265432 | 0.812025 | 0.952 |
| vegfPathway                   | 21 | 0.399742 | 1.116635 | 0.294574 | 0.800628 | 0.952 |
| mcalpainPathway               | 22 | 0.468105 | 1.109368 | 0.343374 | 0.799474 | 0.952 |
| nthiPathway                   | 21 | 0.398697 | 1.107173 | 0.1875   | 0.788747 | 0.952 |
| arapPathway                   | 16 | 0.42679  | 1.106316 | 0.384236 | 0.771846 | 0.952 |
| ck1Pathway                    | 15 | 0.448784 | 1.105801 | 0.337209 | 0.754806 | 0.952 |
| cblPathway                    | 13 | 0.437466 | 1.103004 | 0.179856 | 0.749516 | 0.952 |
| gpcrPathway                   | 31 | 0.443148 | 1.096304 | 0.2723   | 0.756221 | 0.952 |
| carm-erPathway                | 26 | 0.453658 | 1.093224 | 0.406593 | 0.746655 | 0.952 |
| chrebpPathway                 | 16 | 0.441001 | 1.081818 | 0.352941 | 0.758918 | 0.952 |
| p35alzheimersPathway          | 10 | 0.472375 | 1.068365 | 0.41206  | 0.792856 | 0.952 |
| pgc1aPathway                  | 23 | 0.419452 | 1.059521 | 0.360825 | 0.810267 | 1     |
| hdacPathway                   | 28 | 0.342839 | 1.058273 | 0.445714 | 0.79722  | 1     |
| tgfbPathway                   | 14 | 0.51476  | 1.056728 | 0.408163 | 0.787618 | 1     |
| srcRPTTPPathway               | 10 | 0.469867 | 1.047647 | 0.503704 | 0.800668 | 1     |
| il6Pathway                    | 19 | 0.492924 | 1.046281 | 0.43787  | 0.789746 | 1     |
| myosinPathway                 | 13 | 0.602226 | 1.040605 | 0.490683 | 0.793202 | 1     |
| hcmvPathway                   | 15 | 0.442352 | 1.040234 | 0.360294 | 0.780643 | 1     |
| ephA4Pathway                  | 10 | 0.462324 | 1.034778 | 0.48538  | 0.783571 | 1     |
| gleevecPathway                | 19 | 0.431017 | 1.025967 | 0.537688 | 0.796589 | 1     |
| tpoPathway                    | 20 | 0.431599 | 1.022126 | 0.429319 | 0.791213 | 1     |
| hifPathway                    | 11 | 0.536749 | 1.017366 | 0.409091 | 0.790878 | 1     |
| eponfkbPathway                | 10 | 0.376317 | 1.016504 | 0.526316 | 0.781658 | 1     |
| Fatty_Acid_Degradation        | 18 | 0.500498 | 1.006381 | 0.429293 | 0.79535  | 1     |
| ecmPathway                    | 19 | 0.53835  | 0.99559  | 0.448052 | 0.810675 | 1     |
| calcineurinPathway            | 18 | 0.454954 | 0.989843 | 0.455782 | 0.808431 | 1     |
| wntPathway                    | 25 | 0.386176 | 0.970229 | 0.599034 | 0.854754 | 1     |
| at1rPathway                   | 32 | 0.354295 | 0.96949  | 0.510791 | 0.843188 | 1     |
| Inflammatory_Response_Pathway | 23 | 0.377258 | 0.962229 | 0.492424 | 0.857342 | 1     |
| g2Pathway                     | 20 | 0.411088 | 0.94995  | 0.441176 | 0.871848 | 1     |
| agpcrPathway                  | 12 | 0.492267 | 0.949891 | 0.543624 | 0.859372 | 1     |
| g1Pathway                     | 22 | 0.33366  | 0.944804 | 0.51087  | 0.865307 | 1     |
| p53_signalling                | 79 | 0.293789 | 0.92056  | 0.461538 | 0.911711 | 1     |
| keratinocytePathway           | 40 | 0.359914 | 0.920556 | 0.508772 | 0.899201 | 1     |
| dreamPathway                  | 12 | 0.429488 | 0.910129 | 0.626263 | 0.905993 | 1     |
| il7Pathway                    | 15 | 0.444152 | 0.907254 | 0.503185 | 0.901541 | 1     |
| insulinPathway                | 17 | 0.389503 | 0.898486 | 0.584541 | 0.909271 | 1     |
| biopeptidesPathway            | 36 | 0.29324  | 0.897622 | 0.753425 | 0.898321 | 1     |
| nfatPathway                   | 46 | 0.343978 | 0.893846 | 0.646667 | 0.895924 | 1     |
| ptdinsPathway                 | 21 | 0.299784 | 0.893207 | 0.581522 | 0.885631 | 1     |
| etsPathway                    | 17 | 0.424847 | 0.888321 | 0.712766 | 0.887057 | 1     |
| telPathway                    | 14 | 0.261722 | 0.883881 | 0.710059 | 0.887558 | 1     |
| erk5Pathway                   | 13 | 0.383634 | 0.881278 | 0.632353 | 0.885908 | 1     |
| fatty_acid_metabolism         | 20 | 0.34878  | 0.857707 | 0.605263 | 0.919992 | 1     |

|                                |    |          |          |          |          |   |
|--------------------------------|----|----------|----------|----------|----------|---|
| gcrPathway                     | 16 | 0.32965  | 0.855617 | 0.674603 | 0.916624 | 1 |
| rac1Pathway                    | 19 | 0.363311 | 0.852548 | 0.701031 | 0.915894 | 1 |
| rasPathway                     | 20 | 0.250126 | 0.850042 | 0.72381  | 0.914484 | 1 |
| drug_resistance_and_metabolism | 83 | 0.251829 | 0.838964 | 0.734568 | 0.925974 | 1 |
| ptenPathway                    | 16 | 0.270634 | 0.823333 | 0.716535 | 0.944771 | 1 |
| cdmacPathway                   | 15 | 0.34614  | 0.816073 | 0.873874 | 0.9486   | 1 |
| hivnefPathway                  | 51 | 0.236357 | 0.807027 | 0.754237 | 0.950246 | 1 |
| p38mapkPathway                 | 38 | 0.274314 | 0.806024 | 0.7      | 0.940117 | 1 |
| igf1Pathway                    | 17 | 0.38516  | 0.798036 | 0.711656 | 0.94586  | 1 |
| tnfr1Pathway                   | 27 | 0.262724 | 0.787446 | 0.836735 | 0.949306 | 1 |
| rbPathway                      | 11 | 0.298482 | 0.781657 | 0.73     | 0.950847 | 1 |
| tRNA_Synthetases               | 18 | 0.291724 | 0.780106 | 0.71123  | 0.945686 | 1 |
| ngfPathway                     | 15 | 0.359079 | 0.765947 | 0.702128 | 0.969776 | 1 |
| tidPathway                     | 17 | 0.214772 | 0.758307 | 0.909091 | 0.97257  | 1 |
| tollPathway                    | 33 | 0.277455 | 0.742799 | 0.909774 | 0.984038 | 1 |
| mef2dPathway                   | 18 | 0.275013 | 0.740056 | 0.783333 | 0.979995 | 1 |
| erkPathway                     | 28 | 0.209314 | 0.738443 | 0.81203  | 0.972077 | 1 |
| stressPathway                  | 25 | 0.220453 | 0.735103 | 0.851282 | 0.967903 | 1 |
| edg1Pathway                    | 23 | 0.262612 | 0.726948 | 0.808511 | 0.967327 | 1 |
| plcePathway                    | 11 | 0.292775 | 0.720434 | 0.888112 | 0.970326 | 1 |
| nos1Pathway                    | 20 | 0.271675 | 0.714267 | 0.845638 | 0.969628 | 1 |
| atrbcrPathway                  | 15 | 0.259317 | 0.707655 | 0.8125   | 0.971103 | 1 |
| achPathway                     | 13 | 0.232314 | 0.706929 | 0.837607 | 0.963044 | 1 |
| il1rPathway                    | 31 | 0.2418   | 0.69794  | 0.858333 | 0.96827  | 1 |
| sppaPathway                    | 21 | 0.283561 | 0.68957  | 0.879433 | 0.969245 | 1 |
| S1P_Signaling                  | 23 | 0.210321 | 0.684509 | 0.836207 | 0.970125 | 1 |
| epoPathway                     | 16 | 0.291768 | 0.676631 | 0.80625  | 0.969255 | 1 |
| gabaPathway                    | 12 | 0.272271 | 0.673282 | 0.871287 | 0.963285 | 1 |
| crebPathway                    | 24 | 0.256483 | 0.656746 | 0.88     | 0.971674 | 1 |
| il2Pathway                     | 21 | 0.265136 | 0.64108  | 0.918605 | 0.974494 | 1 |
| bcrPathway                     | 33 | 0.262399 | 0.635515 | 0.935714 | 0.969225 | 1 |
| p53hypoxiaPathway              | 16 | 0.24596  | 0.617038 | 0.89697  | 0.97287  | 1 |
| Wnt_Signaling                  | 49 | 0.170635 | 0.613468 | 0.930233 | 0.967304 | 1 |
| lairPathway                    | 12 | 0.286678 | 0.605036 | 0.831579 | 0.970174 | 1 |
| mtorPathway                    | 20 | 0.256333 | 0.603488 | 0.928934 | 0.962752 | 1 |
| arenrf2Pathway                 | 14 | 0.268655 | 0.597831 | 0.941936 | 0.955974 | 1 |
| cfrPathway                     | 11 | 0.225728 | 0.555425 | 0.940397 | 0.975554 | 1 |
| il3Pathway                     | 13 | 0.250558 | 0.543795 | 0.935252 | 0.971287 | 1 |

### Proteasome Degradation Pathway

| PROBE     | DESCRIPTION                                          | GENE RANK | METRIC RANK | RES      | CORE ENRICHM. |
|-----------|------------------------------------------------------|-----------|-------------|----------|---------------|
| NM_009439 | proteasome 26S subunit, non-ATPase, 3 (Psmc3), mRNA. | 1509      | 0.095768    | -0.061   | No            |
| NM_019639 | ubiquitin C (Ubc), mRNA.                             | 2285      | 0.071179    | -0.08543 | No            |
| NM_008951 | proteasome 26S subunit, non-ATPase, 4 (Psmc4), mRNA. | 5137      | 0.024785    | -0.24964 | No            |
| NM_134101 | proteasome 26S subunit, non-ATPase, 2 (Psmc2), mRNA. | 5441      | 0.021233    | -0.26126 | No            |
| NM_011874 | proteasome 26S subunit, ATPase, 4 (Psmc4), mRNA.     | 7111      | 0.003588    | -0.36081 | No            |
| NM_023738 | ubiquitin-activating enzyme E1-like (Ube1l), mRNA.   | 7434      | 2.16E-04    | -0.38017 | No            |
| NM_010436 | H2A histone family, member X (H2afx), mRNA.          | 7907      | -0.00486    | -0.40712 | No            |
| NM_008950 | protease 26S subunit, ATPase 5                       | 7985      | -0.00573    | -0.40997 | No            |

|              |                                                                          |       |          |          |     |
|--------------|--------------------------------------------------------------------------|-------|----------|----------|-----|
|              | (Psmc5), mRNA.                                                           |       |          |          |     |
| NM_001033865 | ribosomal protein S27a (Rps27a), mRNA.                                   | 8389  | -0.00963 | -0.43126 | No  |
| NM_019883    | ubiquitin A-52 residue ribosomal protein fusion product 1 (Uba52), mRNA. | 9031  | -0.01609 | -0.46489 | No  |
| NM_008337    | interferon gamma (Ifng), mRNA.                                           | 10952 | -0.03813 | -0.56875 | No  |
| NM_145420    | ubiquitin-conjugating enzyme E2D 1, (Ube2d1), mRNA.                      | 11641 | -0.04775 | -0.59528 | No  |
| NM_027357    | proteasome 26S subunit, non-ATPase, 1 (Psmc1), mRNA.                     | 11753 | -0.04918 | -0.58655 | No  |
| NM_019912    | ubiquitin-conjugating enzyme E2D 2 (Ube2d2), mRNA.                       | 12034 | -0.05326 | -0.58674 | No  |
| NM_011188    | proteasome 26S subunit, ATPase 2 (Psmc2), mRNA.                          | 12734 | -0.06565 | -0.60832 | No  |
| NM_025356    | ubiquitin-conjugating enzyme E2D 3 (Ube2d3), mRNA.                       | 14177 | -0.10225 | -0.66324 | Yes |
| NM_008947    | protease 26S subunit, ATPase 1 (Psmc1), mRNA.                            | 14375 | -0.10924 | -0.64087 | Yes |
| NM_011968    | proteasome subunit, alpha type 6 (Psmc6), mRNA.                          | 14855 | -0.12878 | -0.62938 | Yes |
| NM_008948    | proteasome 26S subunit, ATPase 3 (Psmc3), mRNA.                          | 14871 | -0.12961 | -0.58964 | Yes |
| NM_008946    | proteasome subunit, beta type 6 (Psmc6), mRNA.                           | 15271 | -0.15068 | -0.56645 | Yes |
| NM_001029855 | proteasome 28S subunit, beta (Psmc2), mRNA.                              | 15314 | -0.15334 | -0.5209  | Yes |
| NM_025959    | proteasome 26S subunit, ATPase, 6 (Psmc6), mRNA.                         | 15523 | -0.16581 | -0.48145 | Yes |
| NM_016750    | H2A histone family, member Z (H2afz), mRNA.                              | 15802 | -0.18691 | -0.4396  | Yes |
| NM_026545    | proteasome 26S subunit, non-ATPase, 8 (Psmc8), mRNA.                     | 15848 | -0.19157 | -0.38224 | Yes |
| NM_011966    | proteasome subunit, alpha type 4 (Psmc4), mRNA.                          | 16008 | -0.20581 | -0.32729 | Yes |
| NM_011965    | proteasome subunit, alpha type 1 (Psmc1), mRNA.                          | 16110 | -0.21568 | -0.26574 | Yes |
| NM_011969    | proteasome subunit, alpha type 7 (Psmc7), mRNA.                          | 16128 | -0.21758 | -0.19854 | Yes |
| NM_013585    | proteasome subunit, beta type 9 (Psmc9), mRNA.                           | 16198 | -0.22816 | -0.13115 | Yes |
| NM_080554    | proteasome 26S subunit, non-ATPase, 5 (Psmc5), mRNA.                     | 16303 | -0.24299 | -0.06122 | Yes |
| NM_011187    | proteasome subunit, beta type 7 (Psmc7), mRNA.                           | 16353 | -0.2533  | 0.015262 | Yes |

# GSEA\_Results

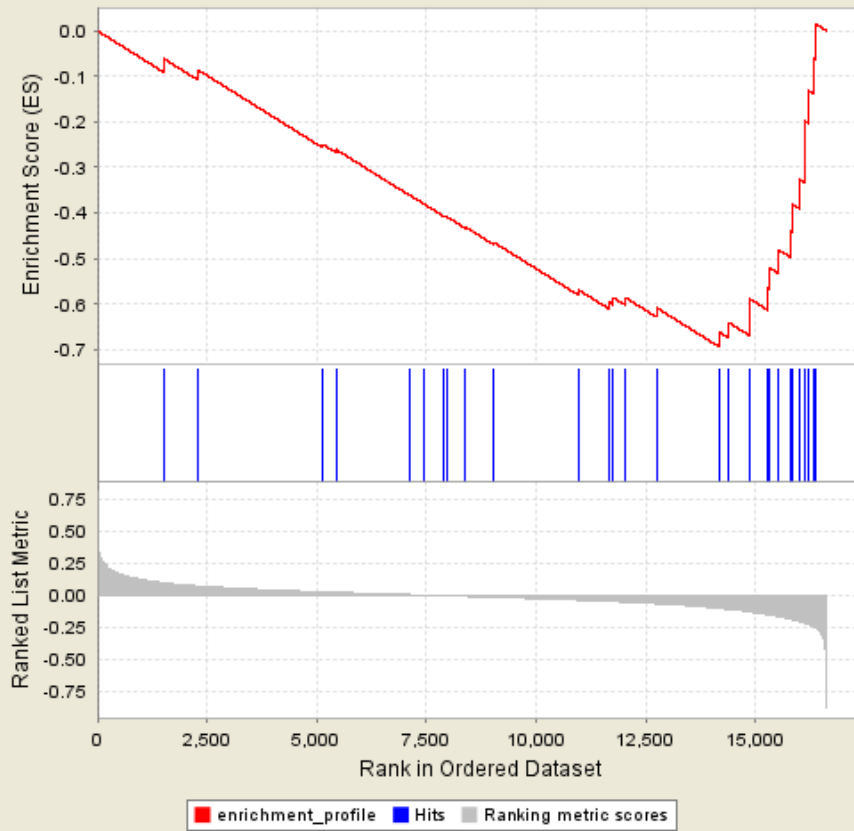

### Null Distribution for Proteasome\_Degradation

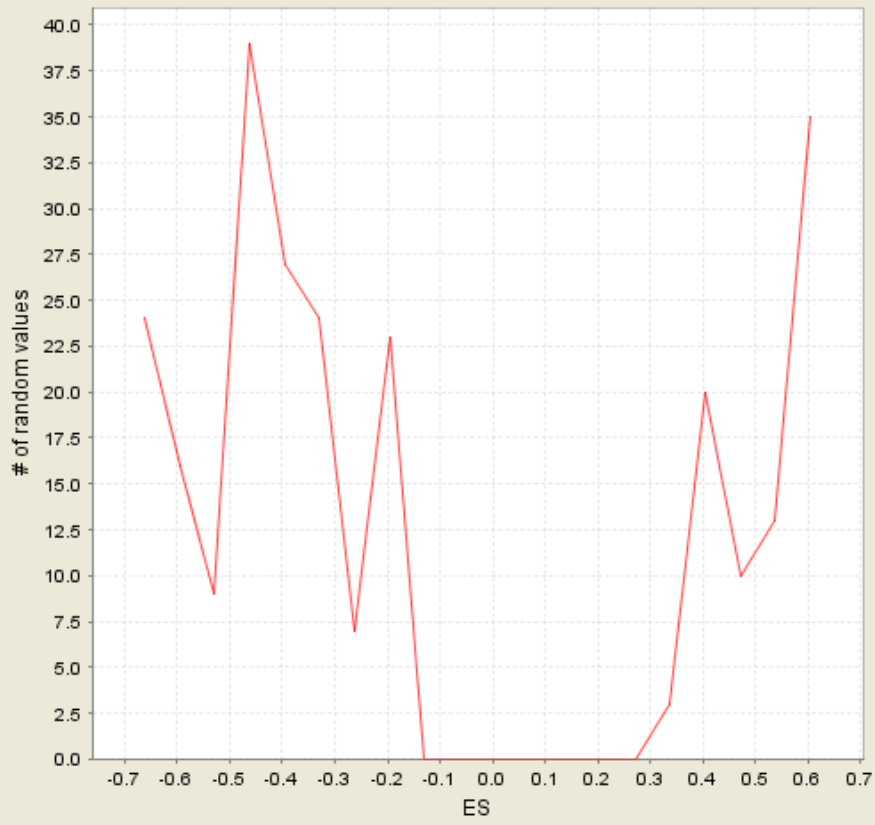

Supplement: pnas_0706027104_1.pdf [file pnas_0706027104_1.pdf]
