# Supplementary material
Source: PubMed Central journal article supplement (PMC1959457)
Supplement: pnas_0706027104_2.pdf [file pnas_0706027104_2.pdf]

**Table 2. Functional annotation analysis** (also presented in Fig. 3A as pie charts)

| Biological processes level 5              | Differentially expressed genes in category |       | P value<br>(Fishers Exact) |
|-------------------------------------------|--------------------------------------------|-------|----------------------------|
|                                           | (n)                                        | (%)   |                            |
| RNA metabolism                            | 39                                         | 5.36  | 3.72E-10                   |
| Protein biosynthesis                      | 41                                         | 5.63  | 1.59E-06                   |
| Cellular macromolecule Catabolism         | 25                                         | 3.43  | 5.23E-06                   |
| Macromolecule biosynthesis                | 42                                         | 5.77  | 1.19E-05                   |
| ER to Golgi vesicle-mediated transport    | 9                                          | 1.24  | 3.48E-04                   |
| Protein transport                         | 44                                         | 6.04  | 9.32E-07                   |
| Establishment of cellular localization    | 44                                         | 6.04  | 3.57E-06                   |
| Biopolymer catabolism                     | 21                                         | 2.88  | 1.12E-05                   |
| Intracellular protein transport           | 30                                         | 4.12  | 8.64E-05                   |
| Cellular protein metabolism               | 132                                        | 18.13 | 7.91E-08                   |
| Intracellular transport                   | 44                                         | 6.04  | 3.02E-06                   |
| Ribosome biogenesis and assembly          | 15                                         | 2.06  | 9.13E-06                   |
| Protein catabolism                        | 20                                         | 2.75  | 1.81E-05                   |
| Golgi vesicle transport                   | 10                                         | 1.37  | 6.05E-04                   |
| Secretory pathway                         | 14                                         | 1.92  | 0.004632                   |
| <b>Cellular component level 4</b>         |                                            |       |                            |
| Mitochondrion                             | 91                                         | 12.50 | 1.25E-21                   |
| Ribosome                                  | 32                                         | 4.40  | 2.26E-12                   |
| Small nucleolar ribonucleoprotein complex | 10                                         | 1.37  | 3.41E-07                   |
| Cytosol                                   | 33                                         | 4.53  | 6.62E-07                   |
| Mitochondrial envelope                    | 29                                         | 3.98  | 2.72E-06                   |
| Proteasome core complex                   | 14                                         | 1.92  | 8.34E-15                   |
| Mitochondrial matrix                      | 15                                         | 2.06  | 2.27E-08                   |
| Organelle inner membrane                  | 29                                         | 3.98  | 4.65E-07                   |
| Intracellular membrane-bound organelle    | 282                                        | 38.74 | 5.09E-15                   |
| Organelle ribosome                        | 15                                         | 2.06  | 6.86E-11                   |
| Mitochondrial inner membrane              | 28                                         | 3.85  | 4.61E-07                   |
| Nucleolus                                 | 18                                         | 2.47  | 1.24E-06                   |
| Large ribosomal subunit                   | 9                                          | 1.24  | 1.62E-05                   |
| Mitochondrial membrane                    | 28                                         | 3.85  | 2.03E-06                   |
| Intracellular non-membr.-bound organelle  | 73                                         | 10.03 | 6.26E-04                   |
| <b>Molecular function level 2</b>         |                                            |       |                            |
| Structural constituent of ribosome        | 36                                         | 4.95  | 5.71E-18                   |
| Electron transporter activity             | 20                                         | 2.75  | 1.12E-05                   |
| DNA-directed RNA polymerase III activity  | 6                                          | 0.82  | 1.59E-04                   |
| DNA-directed RNA polymerase I activity    | 6                                          | 0.82  | 1.59E-04                   |
| Protein binding                           | 151                                        | 20.74 | 6.49E-04                   |
| Carrier activity                          | 28                                         | 3.85  | 9.71E-04                   |
| Isomerase activity                        | 11                                         | 1.51  | 0.011384                   |

|                                                     |    |       |          |
|-----------------------------------------------------|----|-------|----------|
| Selenium binding                                    | 5  | 0.69  | 0.017377 |
| Proteasome endopeptidase activity                   | 13 | 1.79  | 4.38E-15 |
| Hydrolase activity                                  | 94 | 12.91 | 4.97E-05 |
| DNA-directed RNA polymerase II activity             | 6  | 0.82  | 1.59E-04 |
| Oxidoreductase activity                             | 42 | 5.77  | 2.04E-04 |
| Protein transporter activity                        | 12 | 1.65  | 7.25E-04 |
| FK506-sensitive peptidyl-prolyl cis-trans isomerase | 5  | 0.69  | 0.006072 |
| Metal cluster binding                               | 4  | 0.55  | 0.045287 |
| Transcription cofactor activity                     | 8  | 1.10  | 0.097029 |
| RNA polymerase II transcription factor activity     | 7  | 0.96  | 0.014161 |

#### KEGG pathways

---

|                                           |    |      |          |
|-------------------------------------------|----|------|----------|
| Proteasome                                | 15 | 2.06 | 3.91E-12 |
| Pyrimidine metabolism                     | 16 | 2.20 | 3.13E-06 |
| Purine metabolism                         | 18 | 2.47 | 1.01E-04 |
| Basal transcription factors               | 6  | 0.82 | 0.006238 |
| Nucleotide sugars metabolism              | 4  | 0.55 | 0.036632 |
| Oxidative phosphorylation                 | 20 | 2.75 | 2.79E-07 |
| RNA polymerase                            | 9  | 1.24 | 4.53E-06 |
| Protein export                            | 5  | 0.69 | 7.64E-04 |
| Bisphenol A degradation                   | 4  | 0.55 | 0.036632 |
| Snare interactions in vesicular transport | 5  | 0.69 | 0.038108 |
